# Supplementary material for: Species Richness and Range Size of the Terrestrial Mammals of the World: Biological Signal within Mathematical Constraints
Source: PLoS One. 2011 May 6;6(5):e19359. doi: 10.1371/journal.pone.0019359 (PMC3089617; doi:10.1371/journal.pone.0019359)
Supplement: Text S2 — Proof that the mean range equals the proportion of species shared. (DOC) [file pone.0019359.s002.doc]

**Supporting Information 2. Proof that the mean range equals the proportion of species shared.**

The *N*x*N* matrix contains in its diagonal, the richness of sites *1,2,…N*, denoted by *i,i* and in the off-diagonal elements, the number of species shared by two sites, and denoted by *i,h*. This follows from the fact that element *i,h* in the **A** matrix is simply , which, since the delta values are 1 or 0, is but a count of all the joint occurrences of all *S* species in localities *i* and *h*.

The matrix  of dimension *S*x*S*, contains the range value of each species, along the diagonal, and the number of localities shared by species *j* and *k*, *j,k*, off the diagonal.

Let ******= the vector of values of ranges of the *S* species, and recall that **** = the vector of the total values of the ranges of the species inhabiting the *N* sites. Since then it is obvious that, where **1** is a row vector of *N* 1s. And since, then it is also obvious that:

In other words, the sum of the ranges of a species in a site equals the sum of the shared species of that site with all the other sites in the world. The mean-range vector is then:

,

which, by the preceding equation, is the vector of total shared species of each site, proportional to the richness of each site. The vector of mean proportional ranges is therefore equivalent to a vector of average proportional (to its richness) shared species of every site to the rest.
